# Supplementary material
Source: PubMed Central journal article supplement (PMC5401643)
Supplement: NIHMS844197-supplement.pdf [file NIHMS844197-supplement.pdf]

**Appendix**  
**Cooking at Home: A Strategy to Comply With U.S. Dietary Guidelines at No Extra Cost**  
**Tiwari et al.**

**Appendix Table 1.** Distribution of Frequency of Eating-out by Sociodemographic Variables

| Variables                        | Weekly frequency of eating-out |                                   |                                     | Pearson<br>chi <sup>2</sup><br><i>p</i> -value |                                  |
|----------------------------------|--------------------------------|-----------------------------------|-------------------------------------|------------------------------------------------|----------------------------------|
|                                  | All n=437<br>n (%)             | Low<br>0-3/week<br>n=281<br>n (%) | Medium<br>4-5/week<br>n=77<br>n (%) |                                                | High<br>6+/week<br>n=79<br>n (%) |
| Gender                           |                                |                                   |                                     |                                                |                                  |
| Men                              | 131 (30.0)                     | 76 (27.1)                         | 22 (28.6)                           | 33 (41.8)                                      | <b>0.040</b>                     |
| Women                            | 306 (70.0)                     | 205 (72.9)                        | 55 (71.4)                           | 46 (58.2)                                      |                                  |
| Age categories (years)           |                                |                                   |                                     |                                                | 0.525                            |
| 21-49                            | 263 (60.0)                     | 166 (59.1)                        | 45 (58.4)                           | 52 (65.8)                                      |                                  |
| ≥50                              | 174 (40.0)                     | 115 (40.9)                        | 32 (41.6)                           | 27 (34.2)                                      |                                  |
| Race/ethnicity                   |                                |                                   |                                     |                                                | 0.330                            |
| White                            | 374 (85.6)                     | 238 (84.7)                        | 70 (90.9)                           | 66 (83.5)                                      |                                  |
| Non-white                        | 63 (14.4)                      | 43 (15.3)                         | 7 (9.1)                             | 13 (16.5)                                      |                                  |
| Annual household income (\$)     |                                |                                   |                                     |                                                | 0.299                            |
| <50,000                          | 119 (27.2)                     | 80 (28.5)                         | 20 (26.0)                           | 19 (24.1)                                      |                                  |
| ≥50,000 - <100,000               | 158 (36.6)                     | 103 (36.7)                        | 27 (35.1)                           | 28 (35.4)                                      |                                  |
| ≥100,000                         | 149 (34.0)                     | 93 (33.1)                         | 25 (32.5)                           | 31 (39.2)                                      |                                  |
| Education                        |                                |                                   |                                     |                                                | 0.120                            |
| Some college or less (<16 years) | 159 (36.4)                     | 112 (39.9)                        | 28 (36.4)                           | 19 (24.1)                                      |                                  |
| College graduate (16 years)      | 151 (34.6)                     | 89 (31.7)                         | 27 (35.1)                           | 35 (44.3)                                      |                                  |
| Post-graduate (>16 years)        | 127 (29.1)                     | 80 (28.5)                         | 22 (28.6)                           | 25 (31.7)                                      |                                  |
| Marital status                   |                                |                                   |                                     |                                                | <b>0.001</b>                     |
| Married                          | 189 (43.3)                     | 176 (62.6)                        | 40 (51.9)                           | 32 (40.5)                                      |                                  |
| Unmarried                        | 248 (56.8)                     | 105 (37.4)                        | 37 (48.1)                           | 47 (59.5)                                      |                                  |
| Household size                   |                                |                                   |                                     |                                                | <b>0.001</b>                     |
| 1 person                         | 121 (27.7)                     | 61 (21.7)                         | 27 (35.1)                           | 33 (41.8)                                      |                                  |
| 2-6 people                       | 316 (72.3)                     | 220 (79.3)                        | 50 (64.9)                           | 46 (58.2)                                      |                                  |
| Children <12 years               |                                |                                   |                                     |                                                | <b>0.031</b>                     |
| None                             | 308 (70.5)                     | 186 (66.2)                        | 60 (77.9)                           | 62 (78.5)                                      |                                  |
| 1-4                              | 129 (29.5)                     | 95 (33.8)                         | 17 (22.1)                           | 17 (21.5)                                      |                                  |
| Employment status                |                                |                                   |                                     |                                                | 0.079                            |
| Yes                              | 326 (74.6)                     | 200 (71.2)                        | 61 (79.2)                           | 65 (82.3)                                      |                                  |
| No                               | 111 (25.4)                     | 81 (28.8)                         | 16 (20.8)                           | 14 (17.7)                                      |                                  |

Notes: Boldface indicates statistical significance ( $p < 0.05$ ).

**Appendix**  
**Cooking at Home: A Strategy to Comply With U.S. Dietary Guidelines at No Extra Cost**  
**Tiwari et al.**

**Appendix Table 2.** Mean HEI 2005 and HEI 2010 Scores by Sociodemographic Variables and the Frequency of Cooking-at-Home, and Frequency of Eating-out

| Variables                                    | Total<br>n (%) | HEI 2005<br>Mean (SD) | HEI 2010<br>Mean (SD) |
|----------------------------------------------|----------------|-----------------------|-----------------------|
| All                                          | 437            | 71.5 (9.6)            | 71.7 (9.9)            |
| Gender                                       |                |                       |                       |
| Men                                          | 131 (30.0)     | 68.9 (11.4)           | 70.1 (11.6)           |
| Women                                        | 306 (70.0)     | 73.2 (8.4)            | 72.7 (9.2)            |
| <i>p</i> -value                              |                | <b>0.001</b>          | <b>0.001</b>          |
| Age categories (years)                       |                |                       |                       |
| 21-49                                        | 263 (60.0)     | 71.4 (9.9)            | 71.2 (10.7)           |
| ≥50                                          | 174 (40.0)     | 72.6 (9.2)            | 73.0 (9.1)            |
| <i>p</i> -value                              |                | 0.188                 | 0.074                 |
| Race/ethnicity                               |                |                       |                       |
| White                                        | 374 (85.6)     | 72.1 (9.5)            | 72.5 (10.1)           |
| Other                                        | 63 (14.4)      | 70.8 (9.9)            | 68.6 (9.3)            |
| <i>p</i> -value                              |                | 0.319                 | <b>0.001</b>          |
| Annual household income (USD)                |                |                       |                       |
| <50,000                                      | 119 (27.2)     | 70.2 (10.1)           | 69.3 (10.7)           |
| ≥50,000 - <100,000                           | 158 (36.6)     | 71.6 (9.7)            | 72.1 (10.0)           |
| ≥100,000                                     | 149 (34.0)     | 73.7 (9.0)            | 74.0 (9.2)            |
| <i>p</i> -value                              |                | <b>0.024</b>          | <b>0.005</b>          |
| Education                                    |                |                       |                       |
| Some college or less                         | 159 (36.4)     | 70.2 (9.8)            | 69.2 (10.6)           |
| College graduate                             | 151 (34.6)     | 71.2 (10.0)           | 72.1 (10.4)           |
| Post-graduate                                | 127 (29.0)     | 75.0 (8.0)            | 75.1 (8.1)            |
| <i>p</i> -value                              |                | <b>0.001</b>          | <b>0.001</b>          |
| Marital status                               |                |                       |                       |
| Married                                      | 248 (56.8)     | 71.9 (9.2)            | 72.0 (9.6)            |
| Unmarried                                    | 189 (43.3)     | 71.0 (10.0)           | 71.3 (10.2)           |
| <i>p</i> -value                              |                | 0.303                 | 0.481                 |
| Household size                               |                |                       |                       |
| 1 person                                     | 121 (27.7)     | 70.9 (10.1)           | 71.0 (10.8)           |
| 2-6 people                                   | 316 (72.3)     | 71.7 (9.4)            | 72.0 (9.5)            |
| <i>p</i> -value                              |                | 0.393                 | 0.342                 |
| Employment status                            |                |                       |                       |
| Yes                                          | 326 (74.6)     | 71.9 (9.5)            | 72.5 (9.5)            |
| No                                           | 111 (25.4)     | 70.4 (9.8)            | 69.4 (10.5)           |
| <i>p</i> -value                              |                | 0.155                 | <b>0.004</b>          |
| Frequency of cooking dinner at home per week |                |                       |                       |
| Low (0-3/week)                               | 66 (15.0)      | 66.9 (10.2)           | 66.9 (10.5)           |
| Medium (4-5/week)                            | 150 (34.0)     | 70.7 (10.0)           | 70.9 (10.4)           |
| High (6+/week)                               | 221 (50.5)     | 74.4 (8.2)            | 74.2 (8.8)            |
| <i>p</i> -value                              |                | <b>0.001</b>          | <b>0.001</b>          |
| Frequency of eating out                      |                |                       |                       |
| Low (0-3/week)                               | 281 (64.0)     | 73.8 (8.7)            | 73.9 (9.1)            |
| Medium (4-5/week)                            | 77 (17.5)      | 69.5 (9.9)            | 69.3 (10.6)           |
| High (6+/week)                               | 79 (18.0)      | 67.7 (10.6)           | 67.6 (11.2)           |
| <i>p</i> -value                              |                | <b>0.001</b>          | <b>0.001</b>          |

Notes: *p*-values are based on ANOVA and t-test; Boldface indicates statistical significance (*p*<0.05).
